# Supplementary material for: A New Mild Method for Synthesis of Marine Alkaloid Fascaplysin and Its Therapeutically Promising Derivatives
Source: MDPI journal article supplement (doi:10.3390/md21080424), 2023-07-25

# Supporting information

## A New Mild Method for Synthesis of Marine Alkaloid Fascaplysin and Its Therapeutically Promising Derivatives

Oleg A. Tryapkin <sup>1,\*</sup>, Alexey V. Kantemirov <sup>1</sup>, Sergey A. Dyshlovoy <sup>2,3</sup>, Vladimir S. Prassolov <sup>4,5</sup>, Pavel V. Spirin <sup>4,5</sup>, Gunhild von Amsberg <sup>2,3</sup>, Maria A. Sidorova <sup>1</sup> and Maxim E. Zhidkov <sup>1,\*</sup>

<sup>1</sup> Department of Chemistry and Materials, Institute of High Technologies and Advanced Materials, FEFU Campus, Far Eastern Federal University, Ajax Bay 10, Russky Island, 690922 Vladivostok, Russia; kantemirov\_av@dvfu.ru (A.V.K.); sidorova\_ma@dvfu.ru (M.A.S.)

<sup>2</sup> Department of Oncology, Hematology and Bone Marrow Transplantation with Section Pneumology, Hubertus Wald Tumorzentrum – University Cancer Center Hamburg (UCCH), University Medical Center Hamburg-Eppendorf, Martinistrasse 52, 20246 Hamburg, Germany; s.dyshlovoy@uke.de (S.A.D.); g.von-amsberg@uke.de (G.v.A.)

<sup>3</sup> Martini-Klinik Prostate Cancer Center, University Hospital Hamburg-Eppendorf, Martinistrasse 52, 20246 Hamburg, Germany

<sup>4</sup> Department of Cancer Cell Biology, Engelhardt Institute of Molecular Biology, Russian Academy of Sciences, Vavilova 32, 119991 Moscow, Russia; prassolov45@mail.ru (V.S.P.); spirin.pvl@gmail.com (P.V.S.)

<sup>5</sup> Center for Precision Genome Editing and Genetic Technologies for Biomedicine, Engelhardt Institute of Molecular Biology, Russian Academy of Sciences, Vavilova 32, 119991 Moscow, Russia

\* Correspondence: triapkin\_oa@dvfu.ru (O.A.T.); zhidkov.me@dvfu.ru (M.E.Z.)

## Contents

Spectra Data

3-22

## Spectra Data

### $^1\text{H}$ NMR spectra of 3-(3,3-dimethyl-2-oxobutyl)-3-hydroxyindolin-2-one

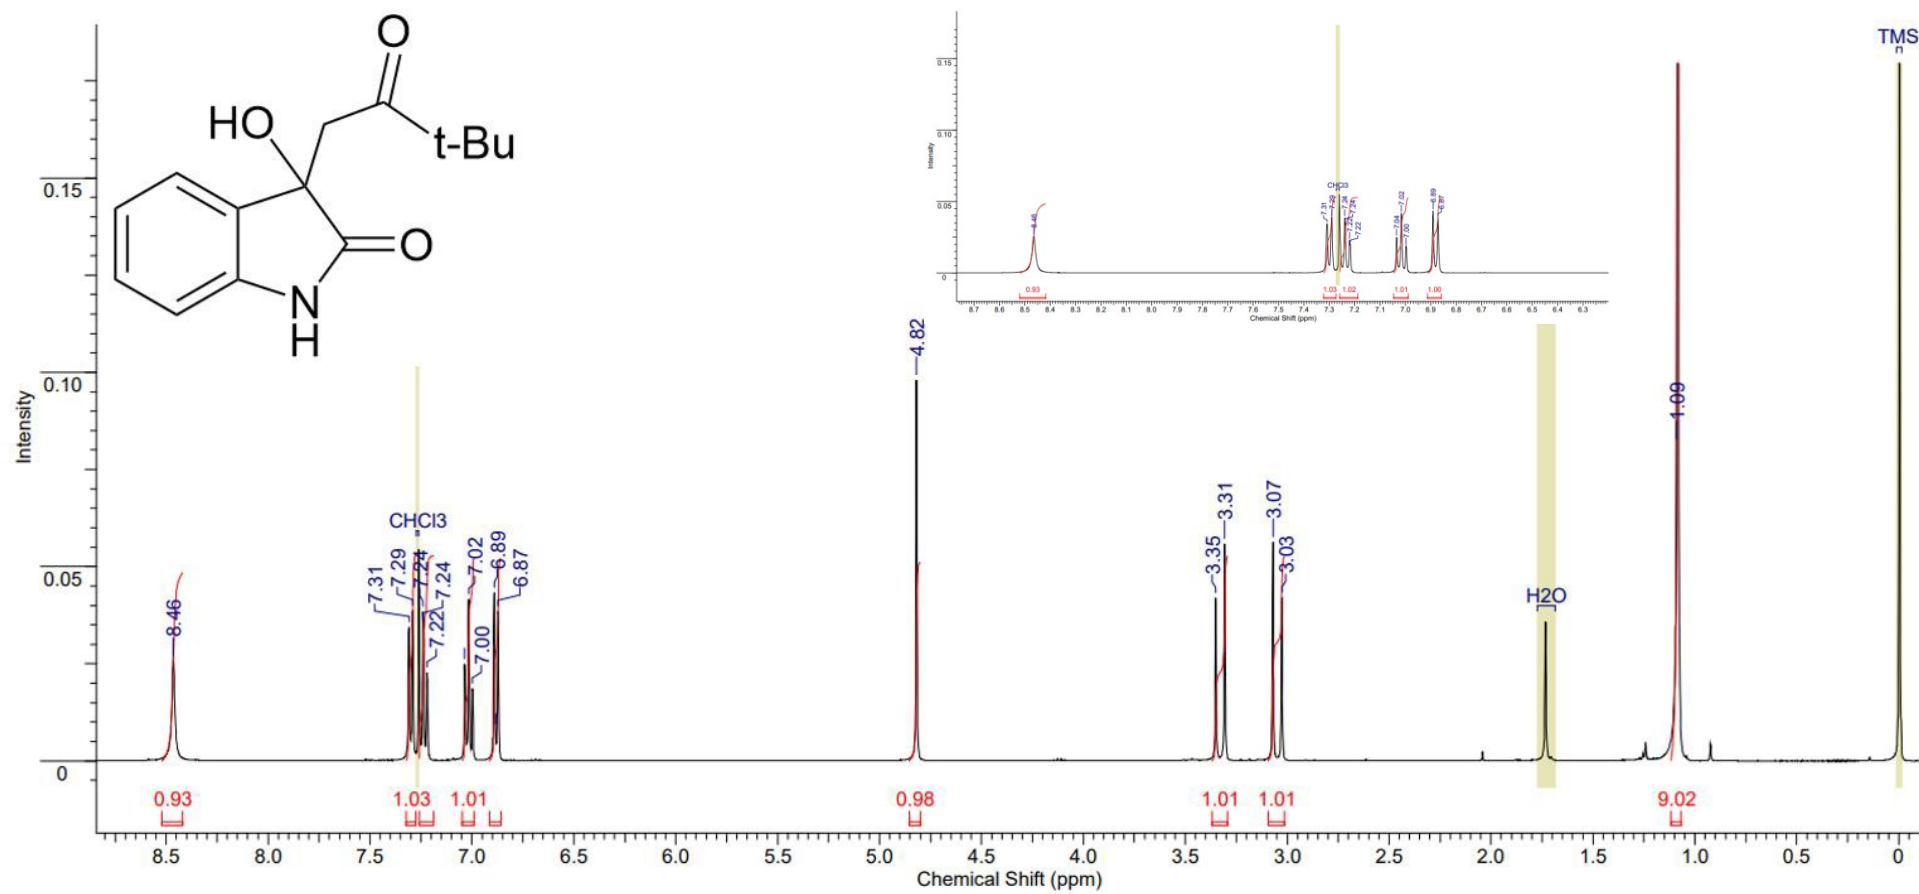

<sup>13</sup>C NMR spectra of 3-(3,3-dimethyl-2-oxobutyl)-3-hydroxyindolin-2-one

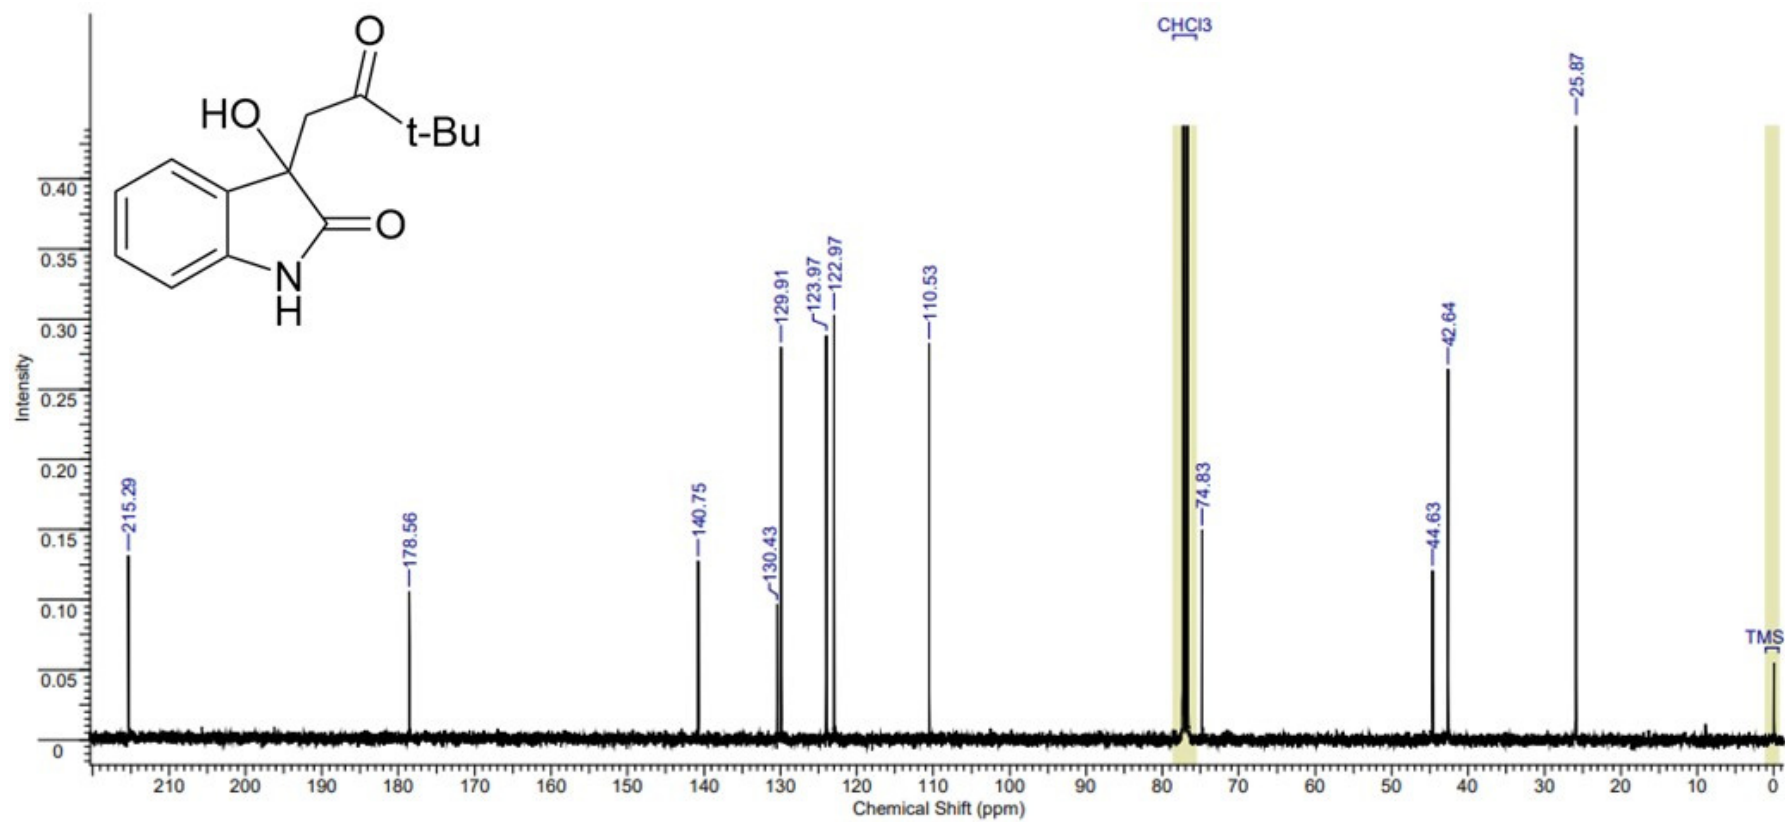

# <sup>1</sup>H NMR spectra of 3-(3,3-dimethyl-2-oxobuten-4-yl)-indolyn-2-one

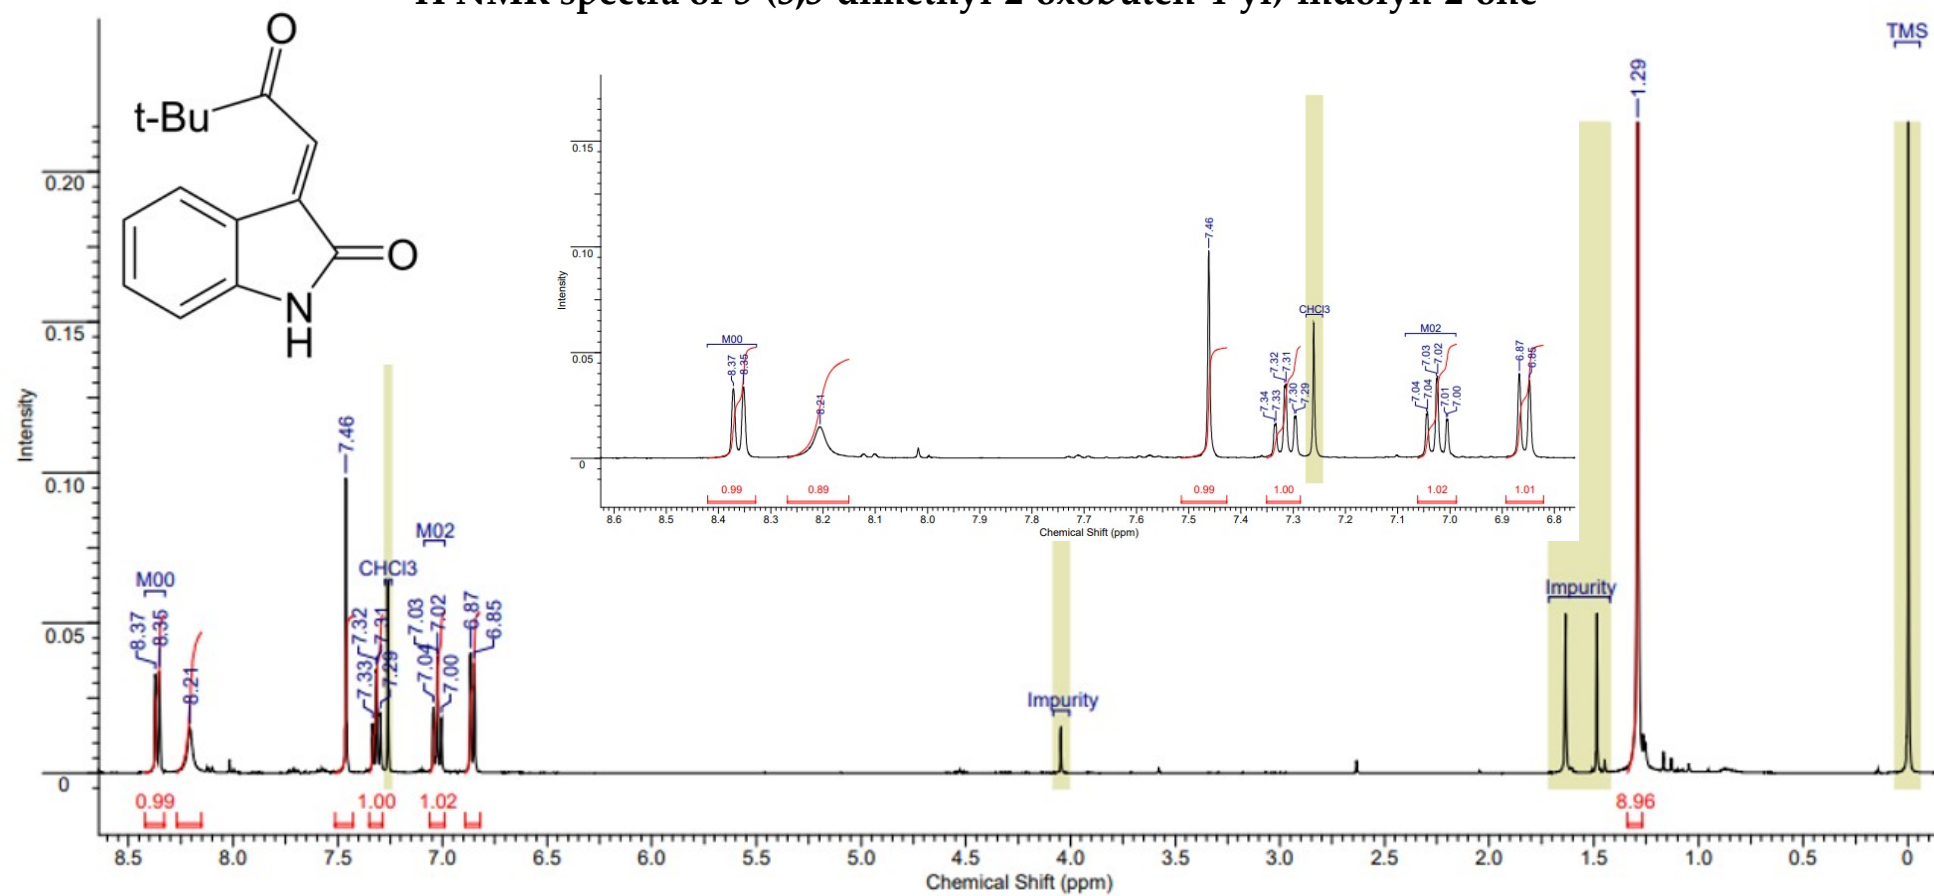

<sup>13</sup>C NMR spectra of 3-(3,3-dimethyl-2-oxobuten-4-yl)-indolyn-2-one

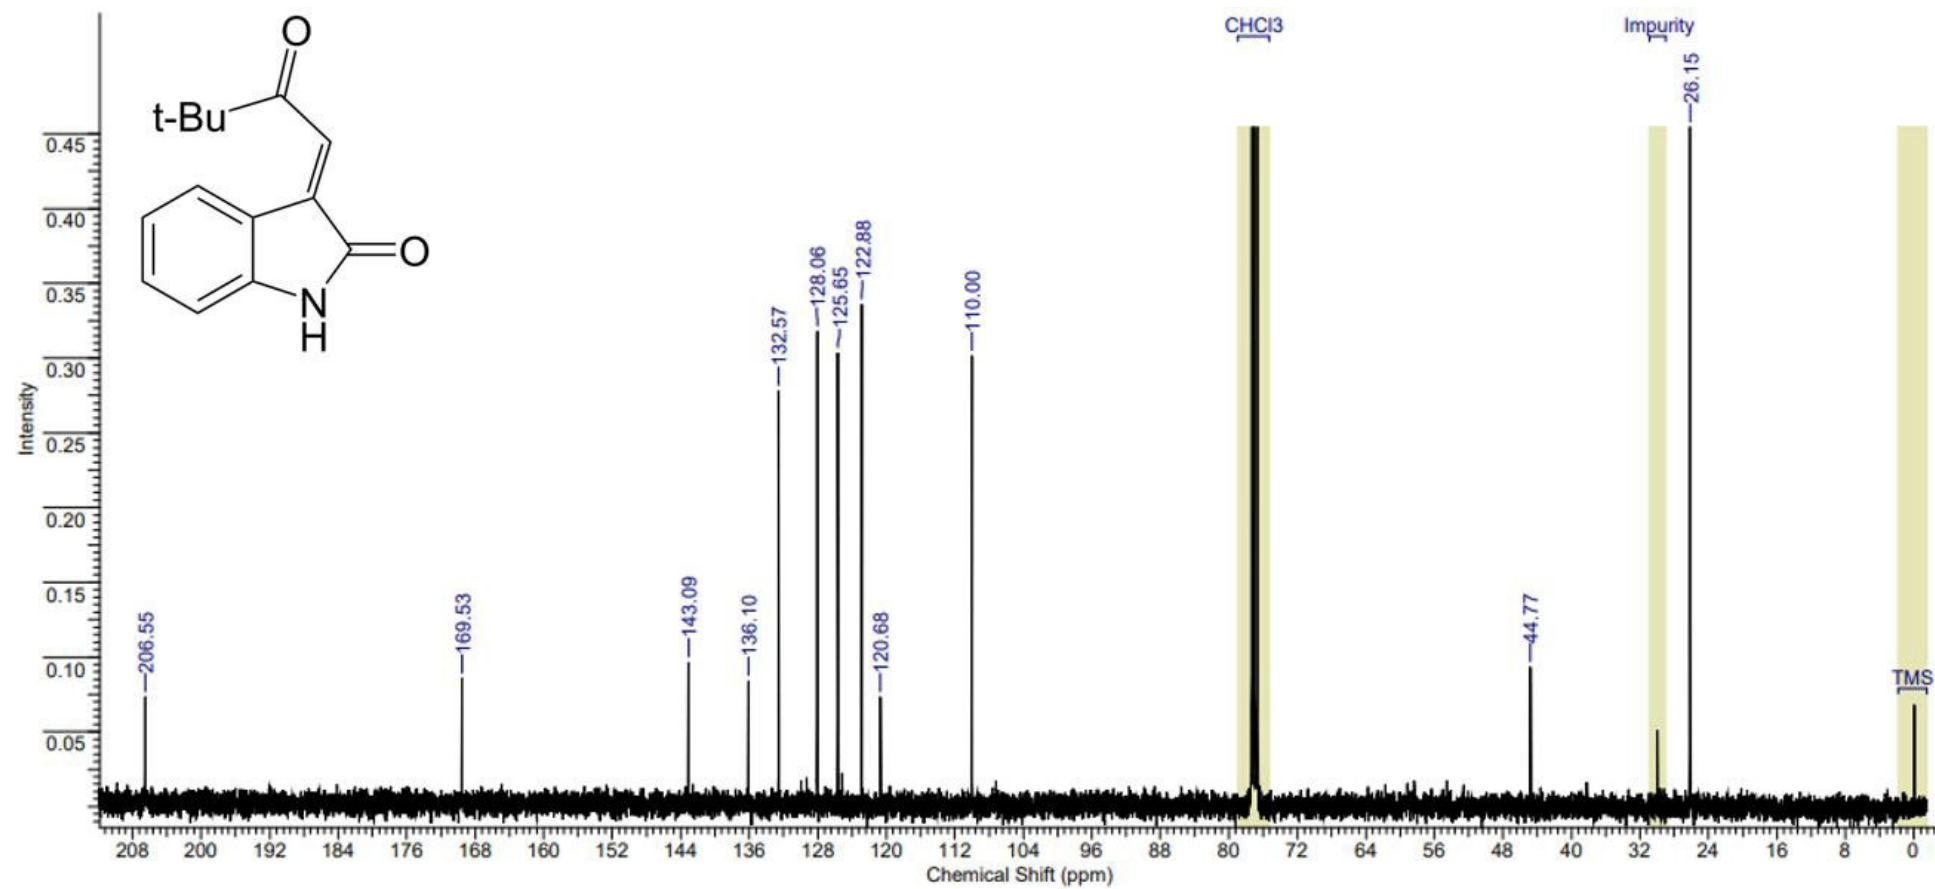

# <sup>1</sup>H NMR spectra of 3-(3,3-dimethyl-2-oxobutyl)-indolyn-2-one

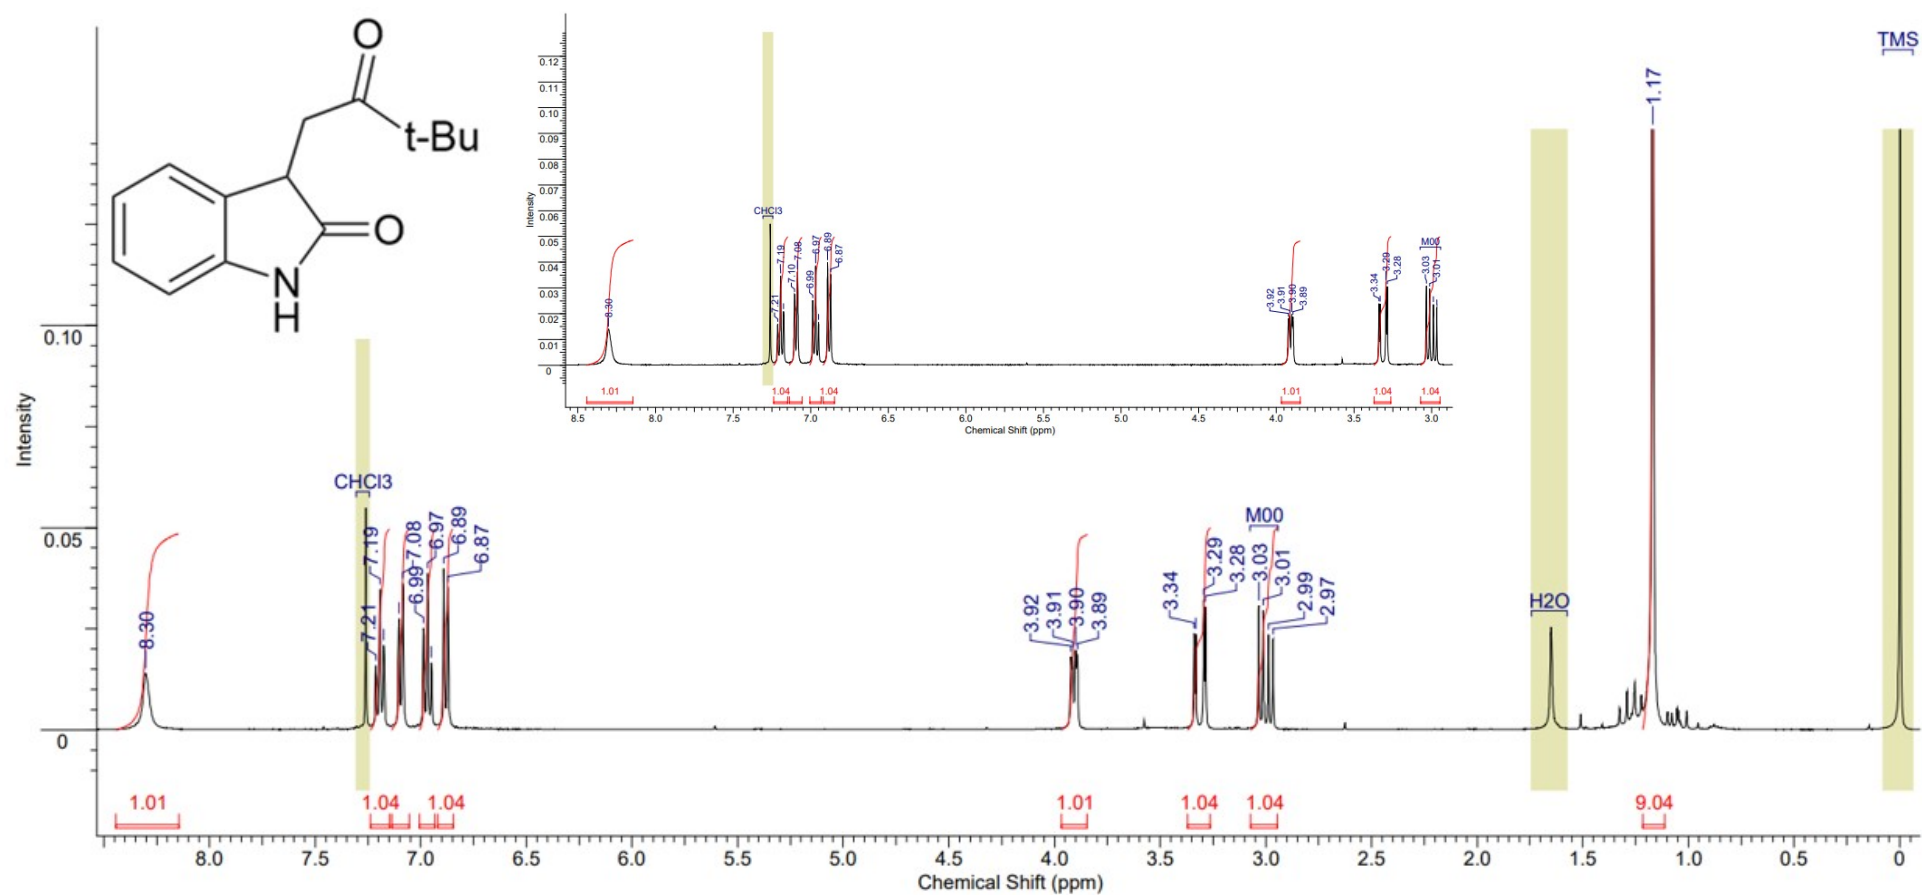

<sup>13</sup>C NMR spectra of 3-(3,3-dimethyl-2-oxobutyl)-indolyn-2-one

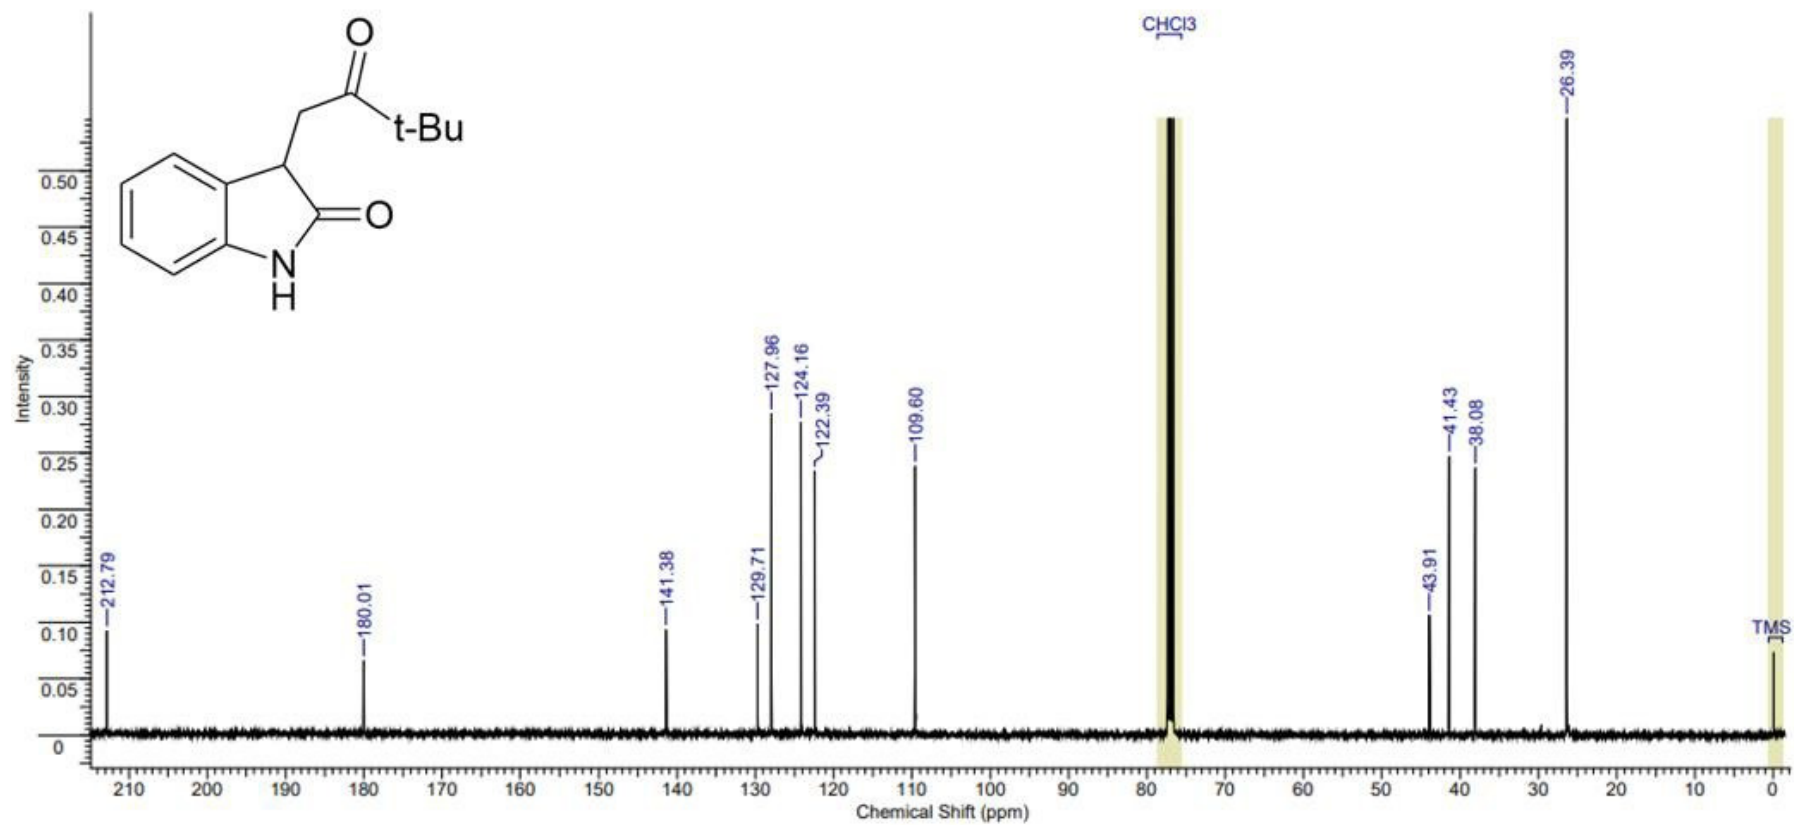



# <sup>1</sup>H NMR spectra of 3-(2-(hydroxyamino)-3,3-dimethylbutyl)-indolyn-2-one

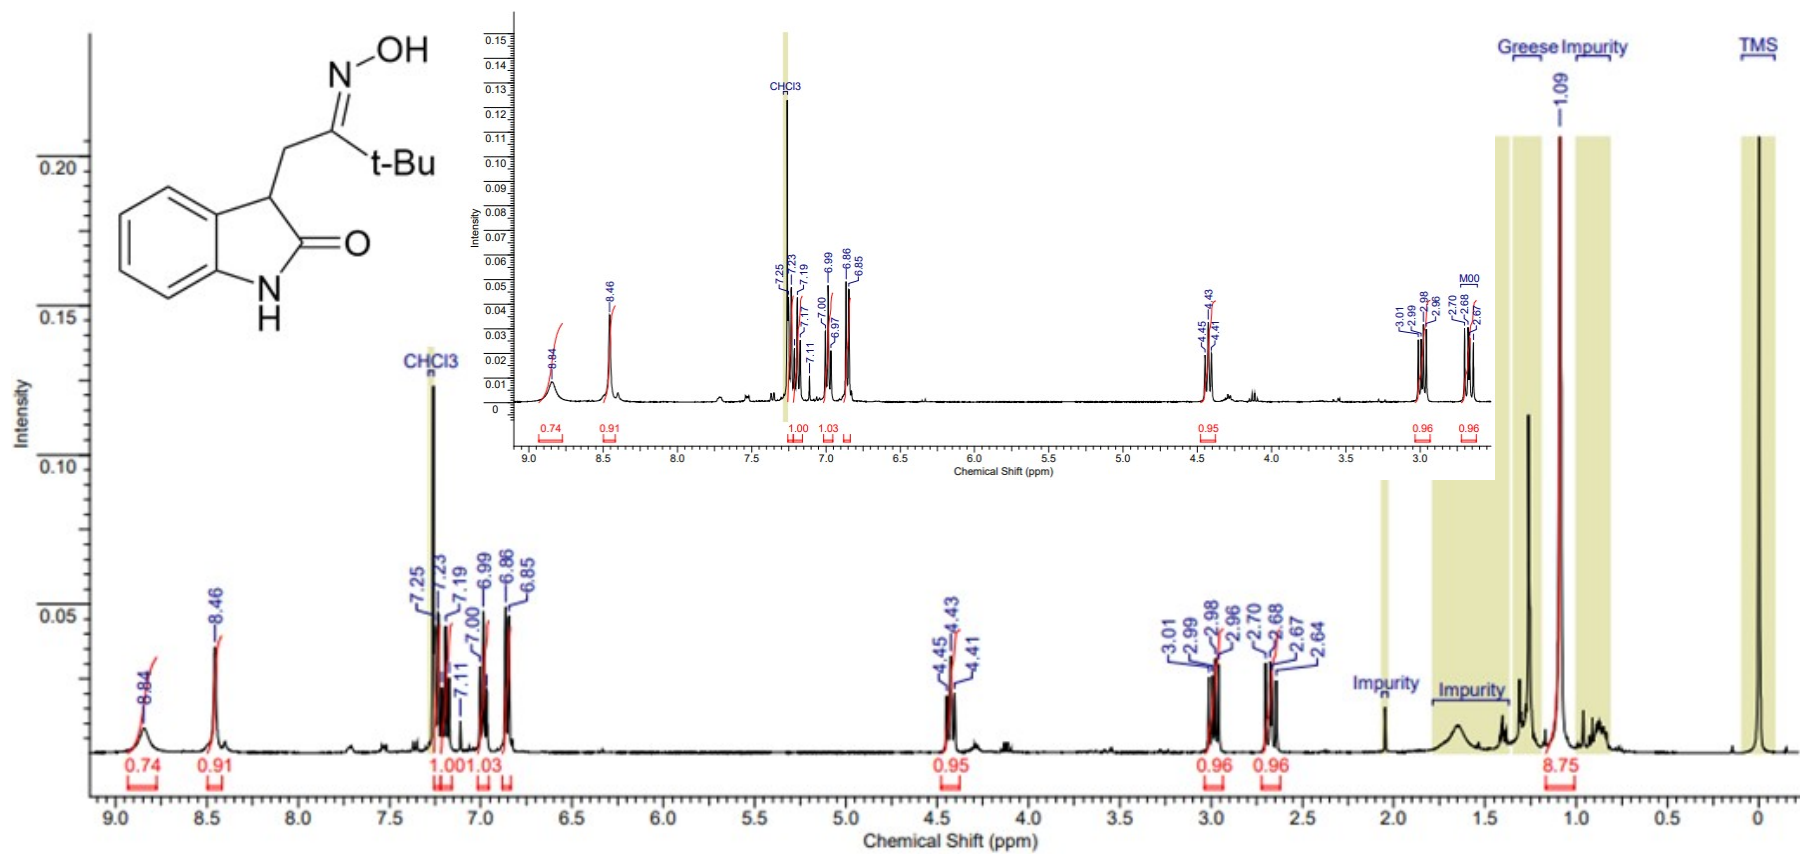

<sup>13</sup>C NMR spectra of 3-(2-(hydroxyamino)-3,3-dimethylbutyl)-indolyn-2-one

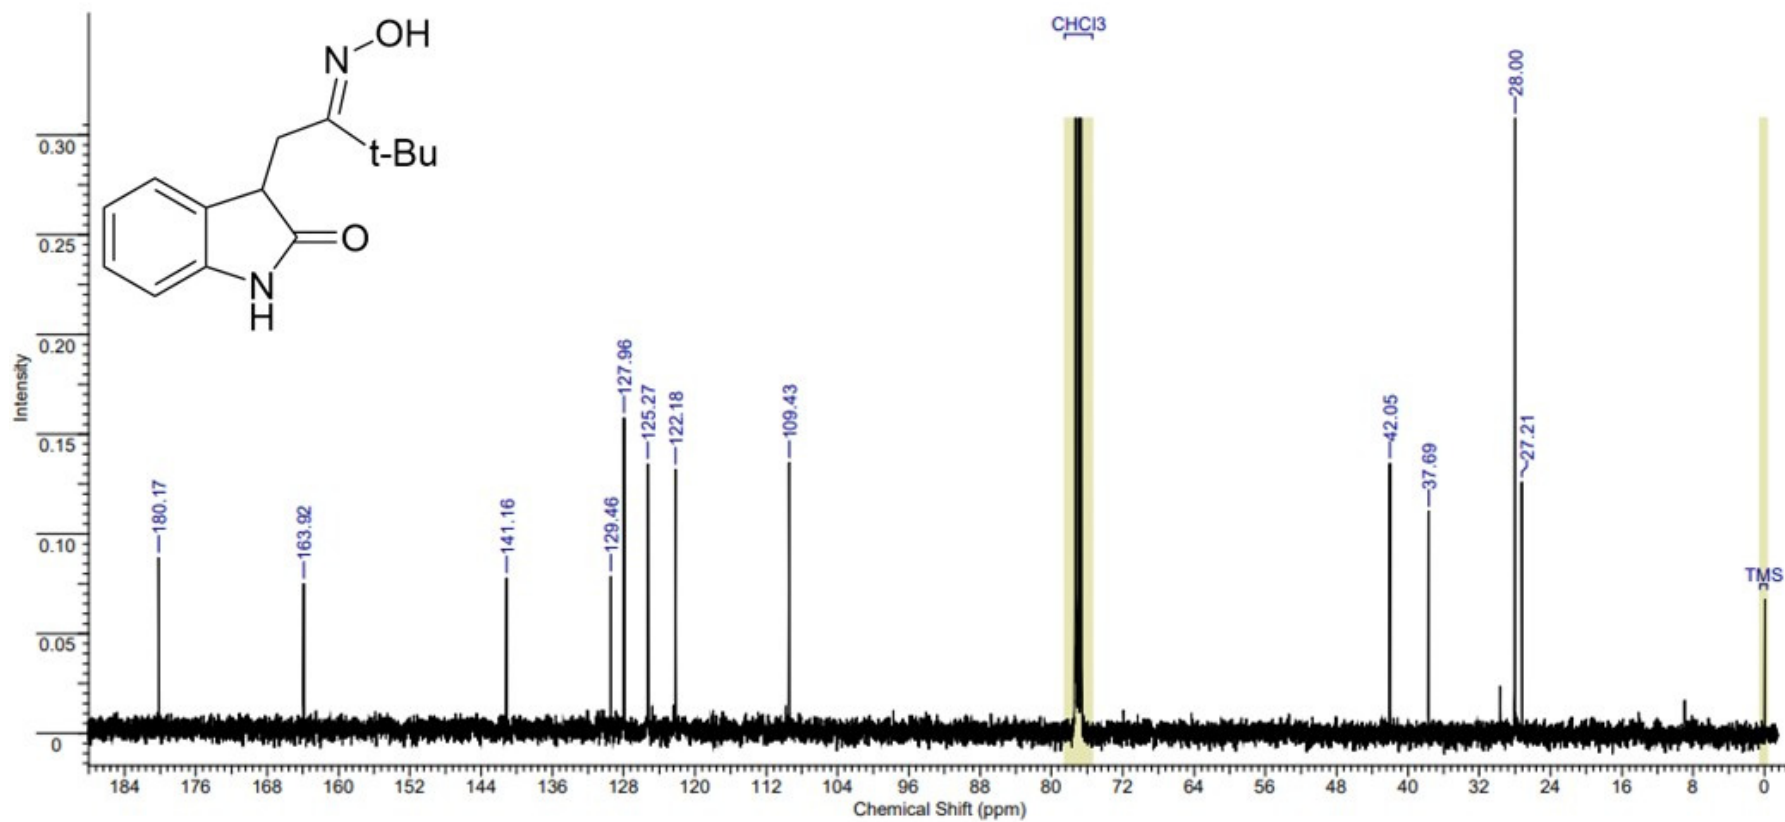

# <sup>1</sup>H NMR spectra of 1-(2'-bromobenzoyl)-6-benzyloxy-β-carboline

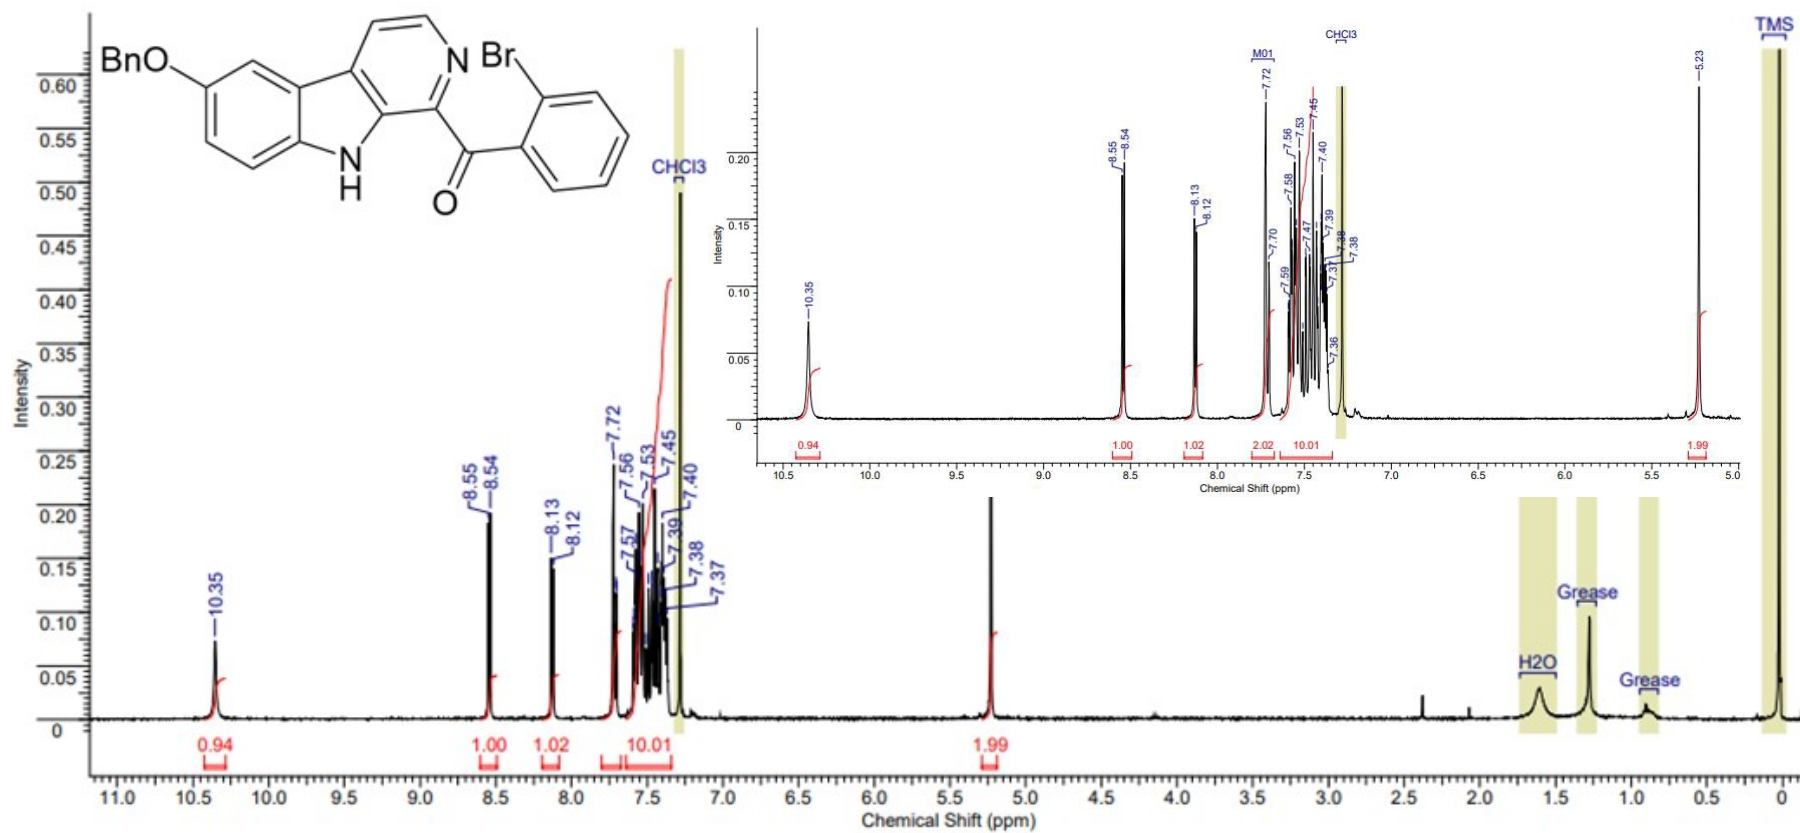

# <sup>13</sup>C NMR spectra of 1-(2'-bromobenzoyl)-6-benzyloxy-β-carboline

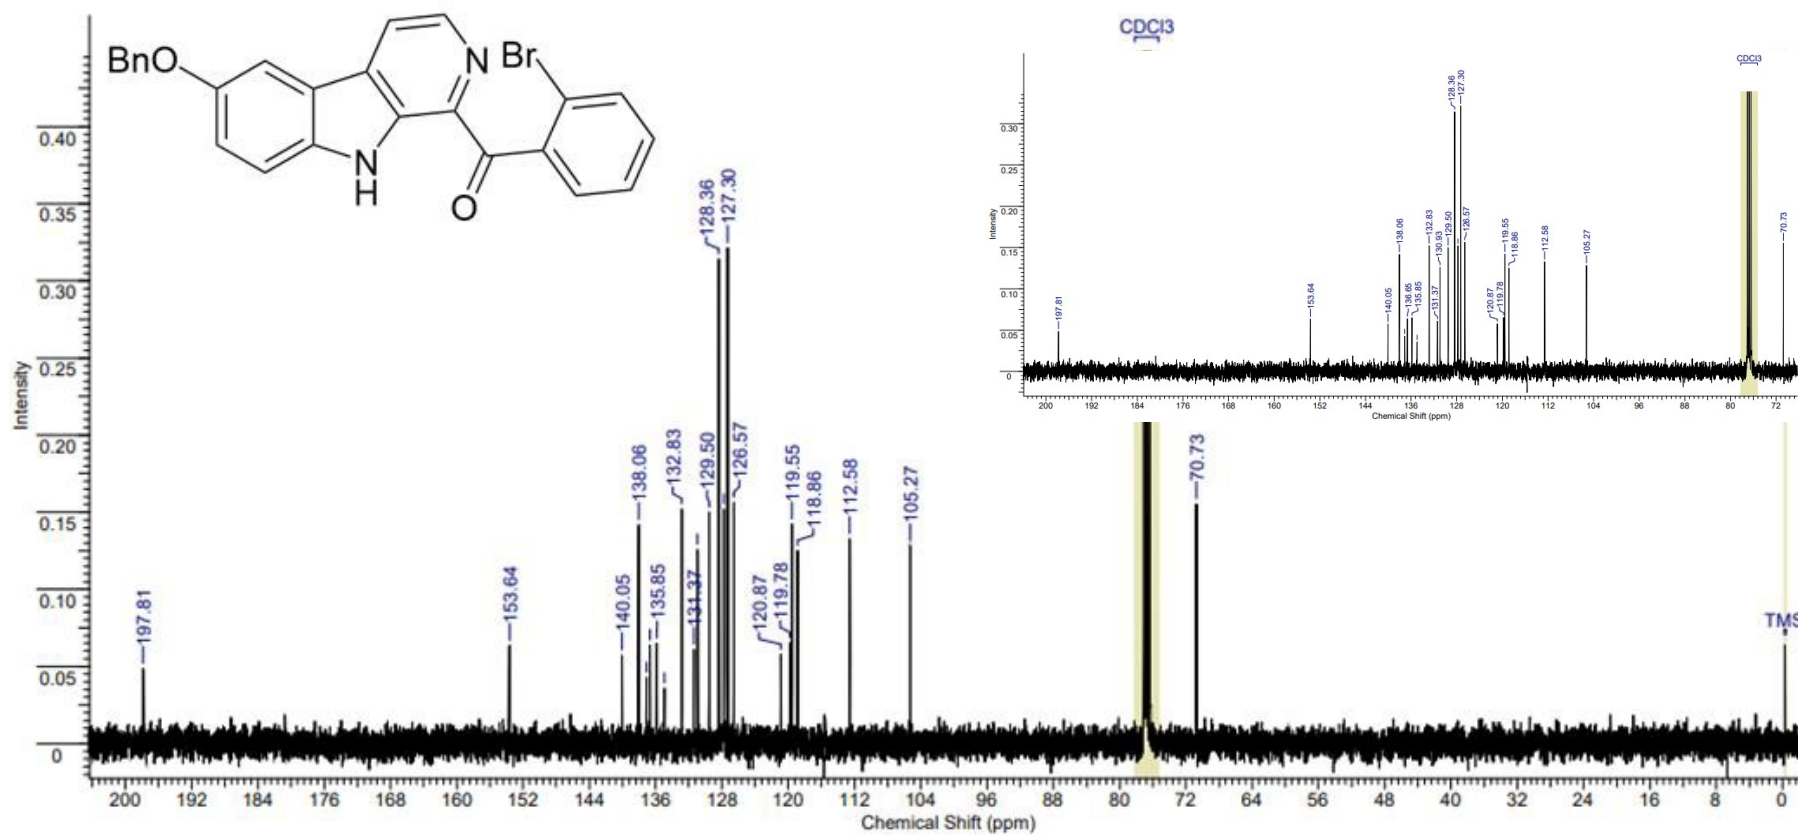

# <sup>1</sup>H NMR spectra of 1-(2'-iodobenzoyl)-6-benzyloxy-β-carboline

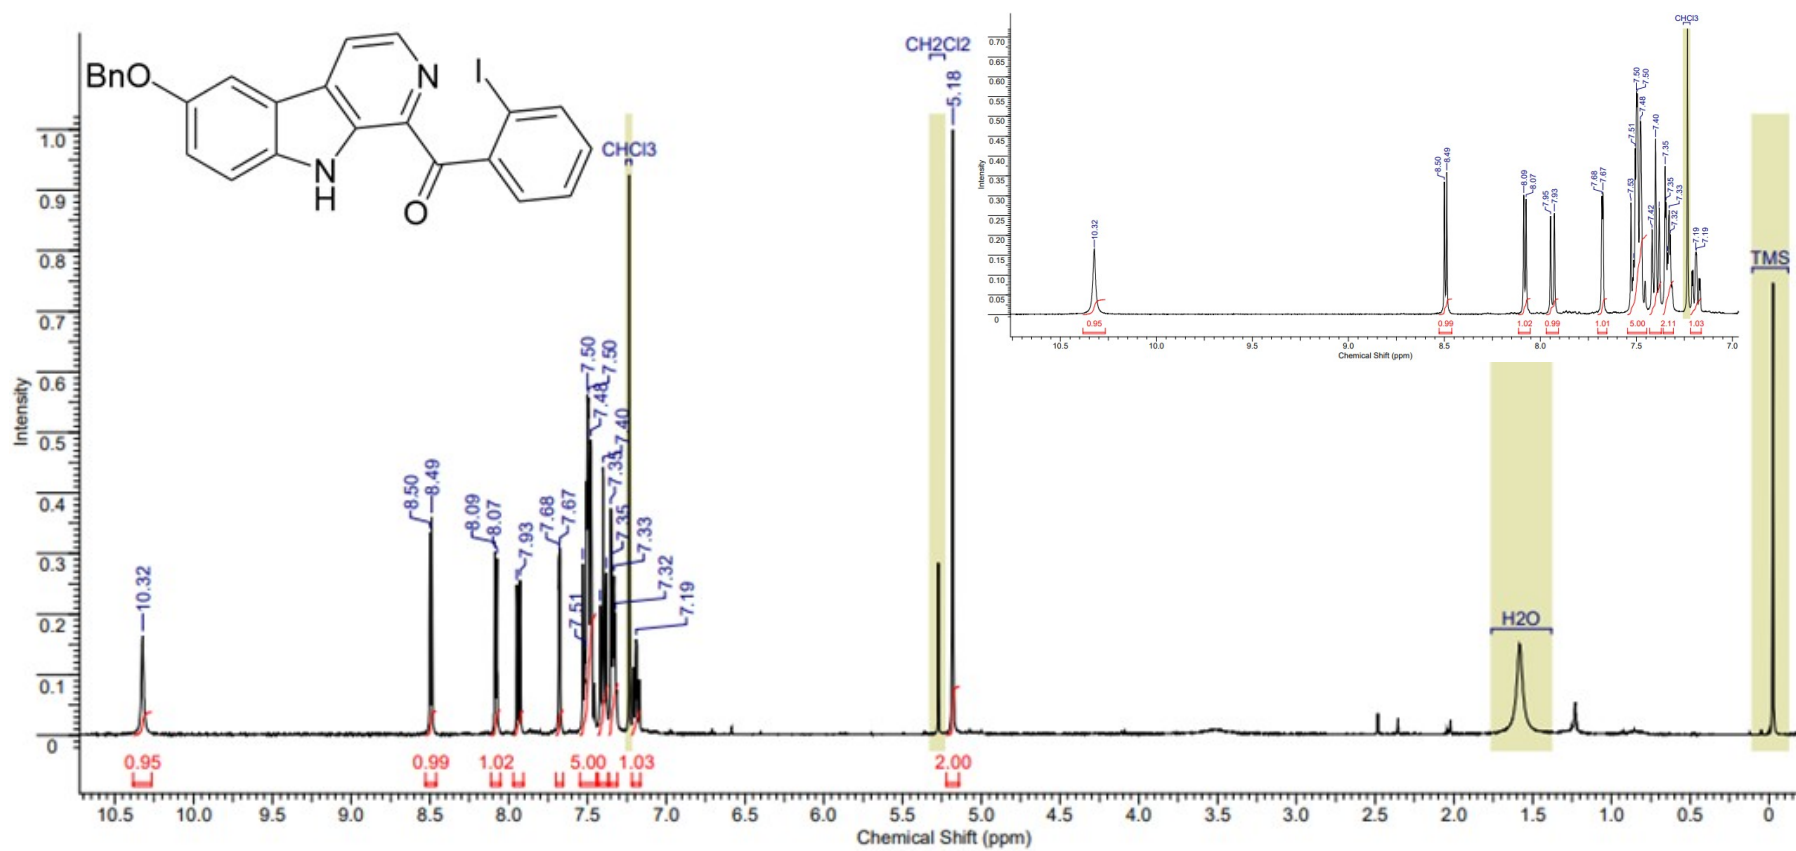

# <sup>13</sup>C NMR spectra of 1-(2'-iodobenzoyl)-6-benzyloxy-β-carboline

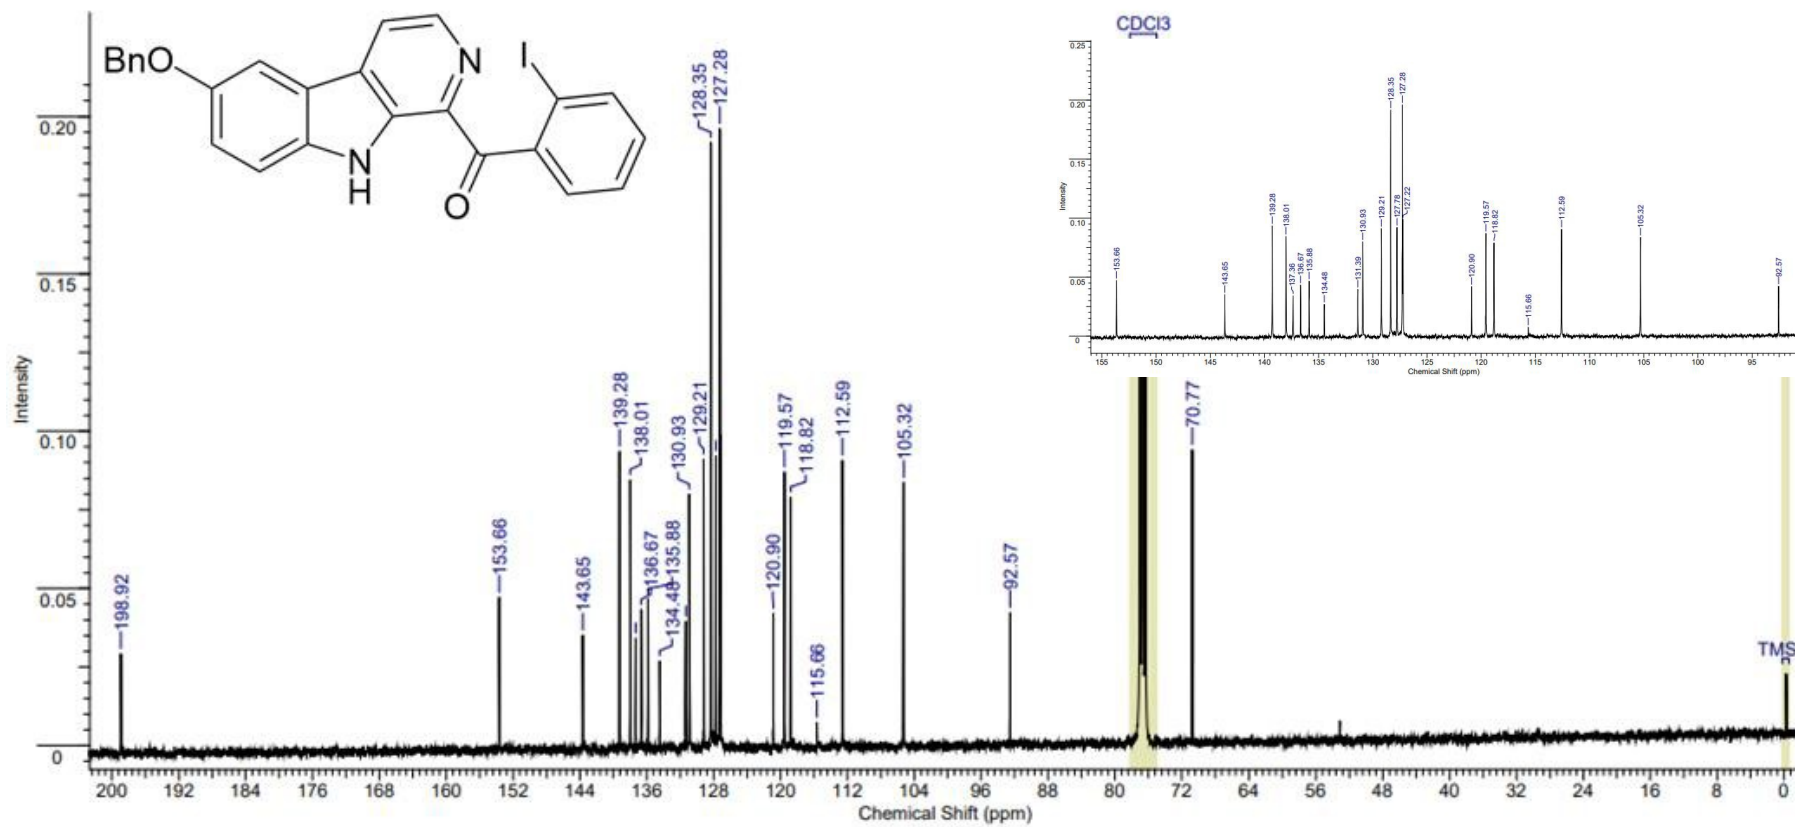

### <sup>1</sup>H NMR spectra of 1-(2'-bromobenzoyl)-3-*tert*-butyl-β-carboline

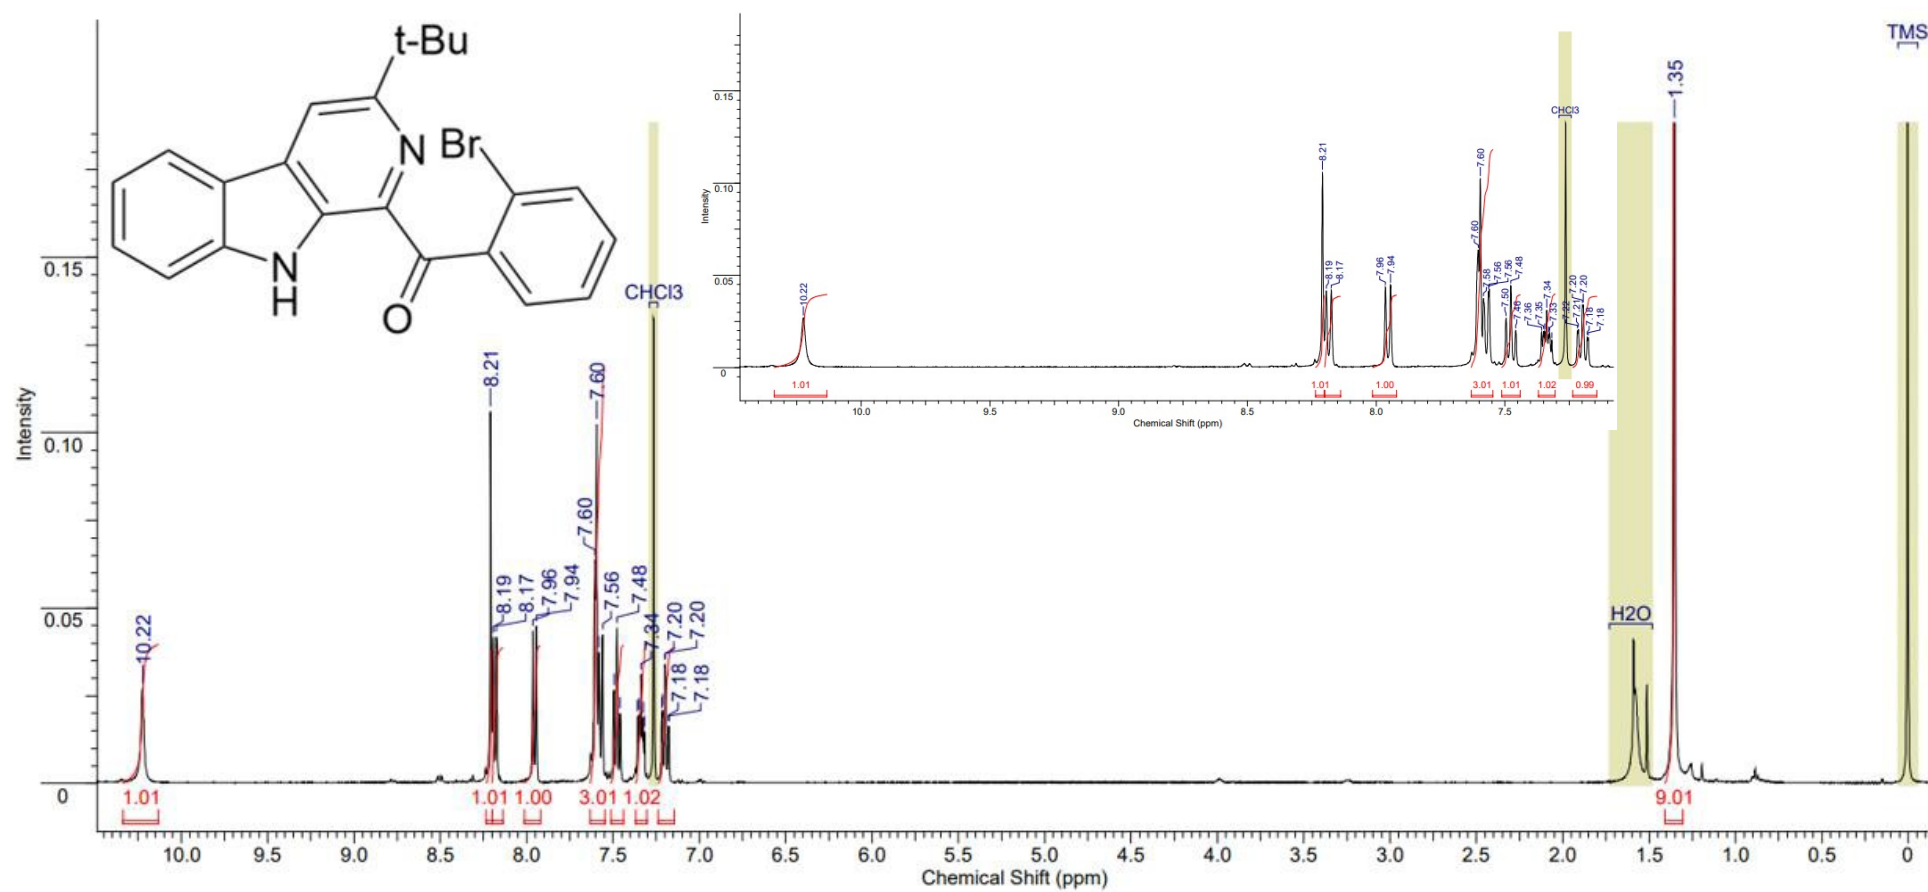



# <sup>13</sup>C NMR spectra of 1-(2'-bromobenzoyl)-3-*tert*-butyl-β-carboline

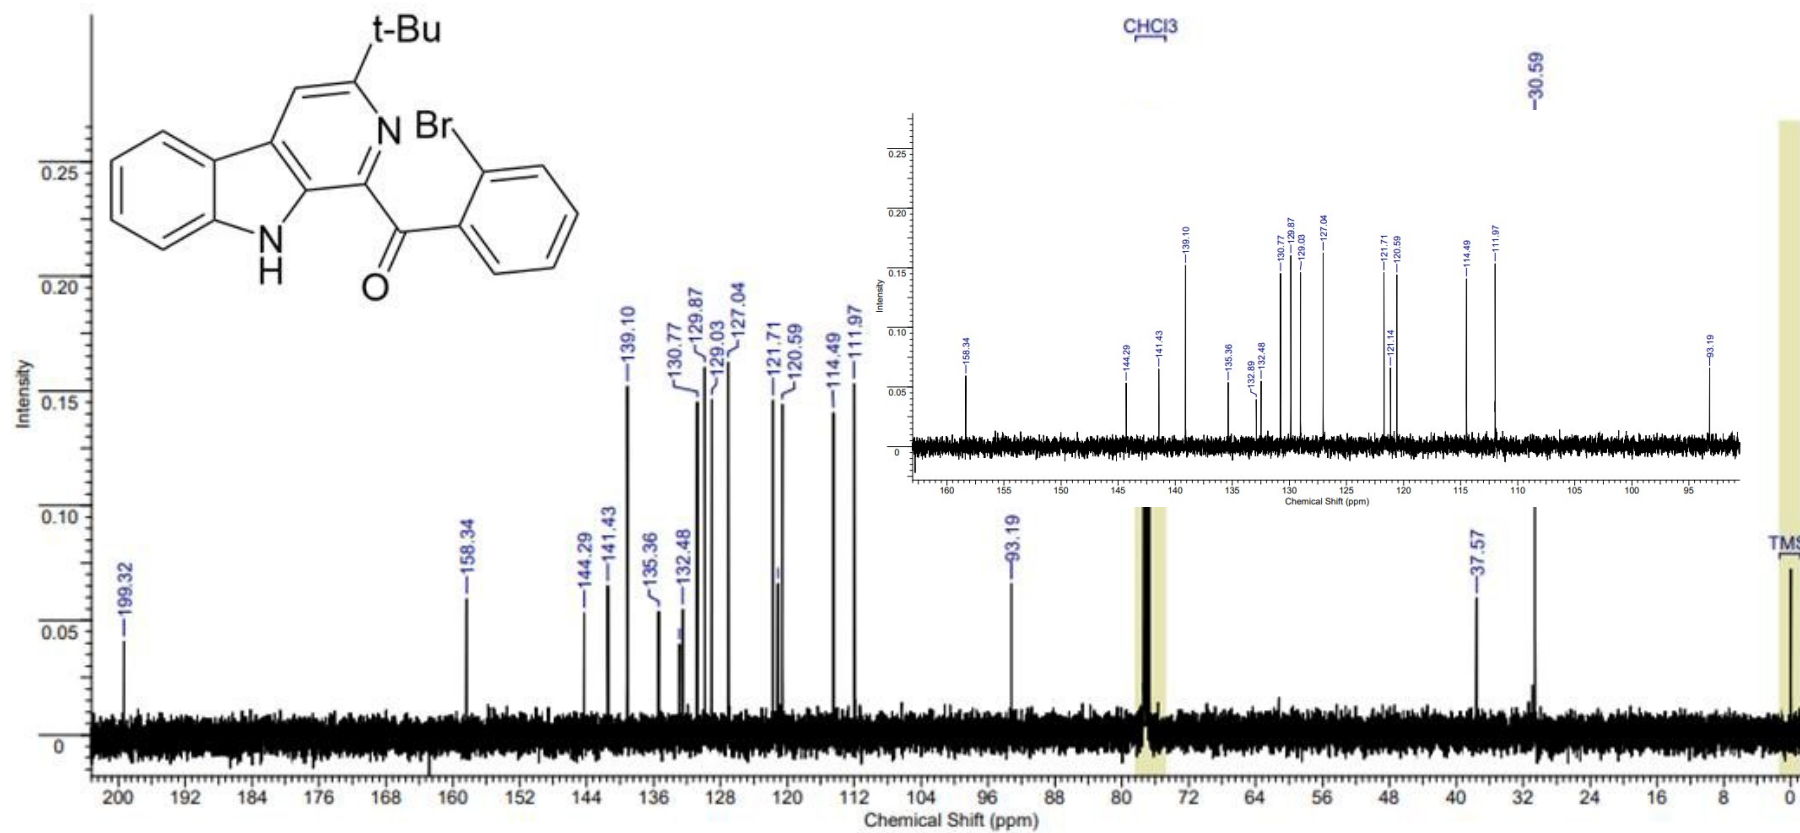



# <sup>1</sup>H NMR spectra of 1-(2'-iodobenzoyl)-3-*tert*-butyl-β-carboline

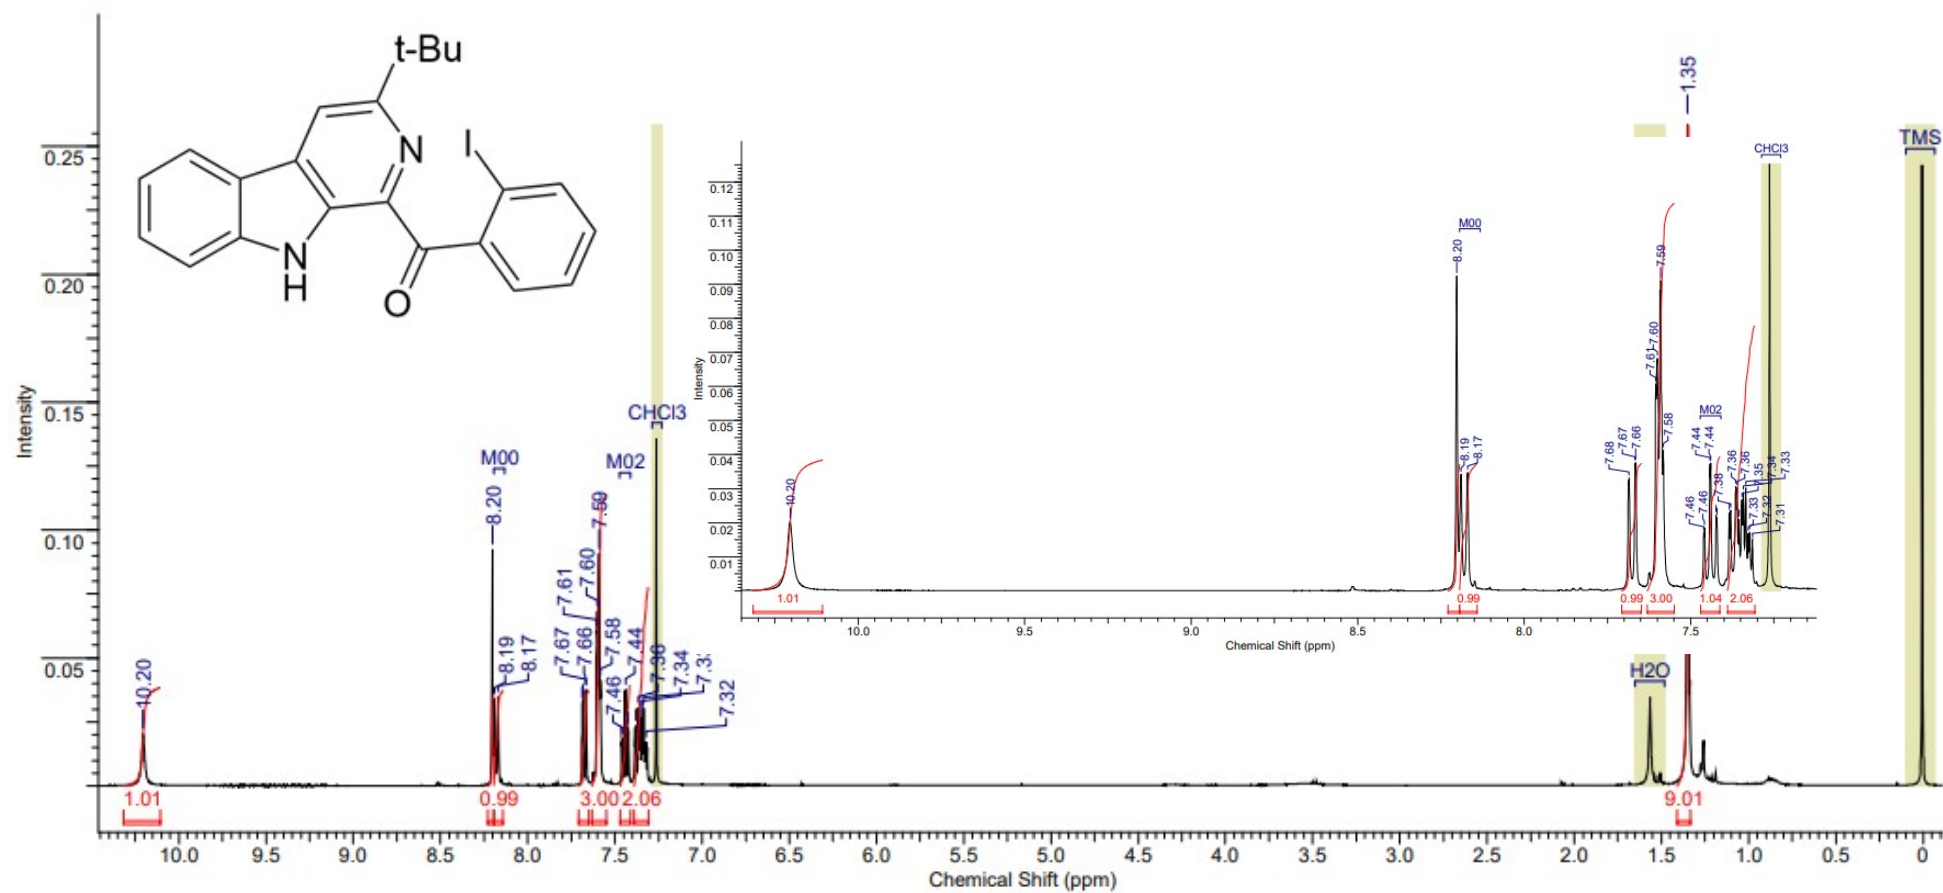

# <sup>13</sup>C NMR spectra of 1-(2'-iodobenzoyl)-3-*tert*-butyl-β-carboline

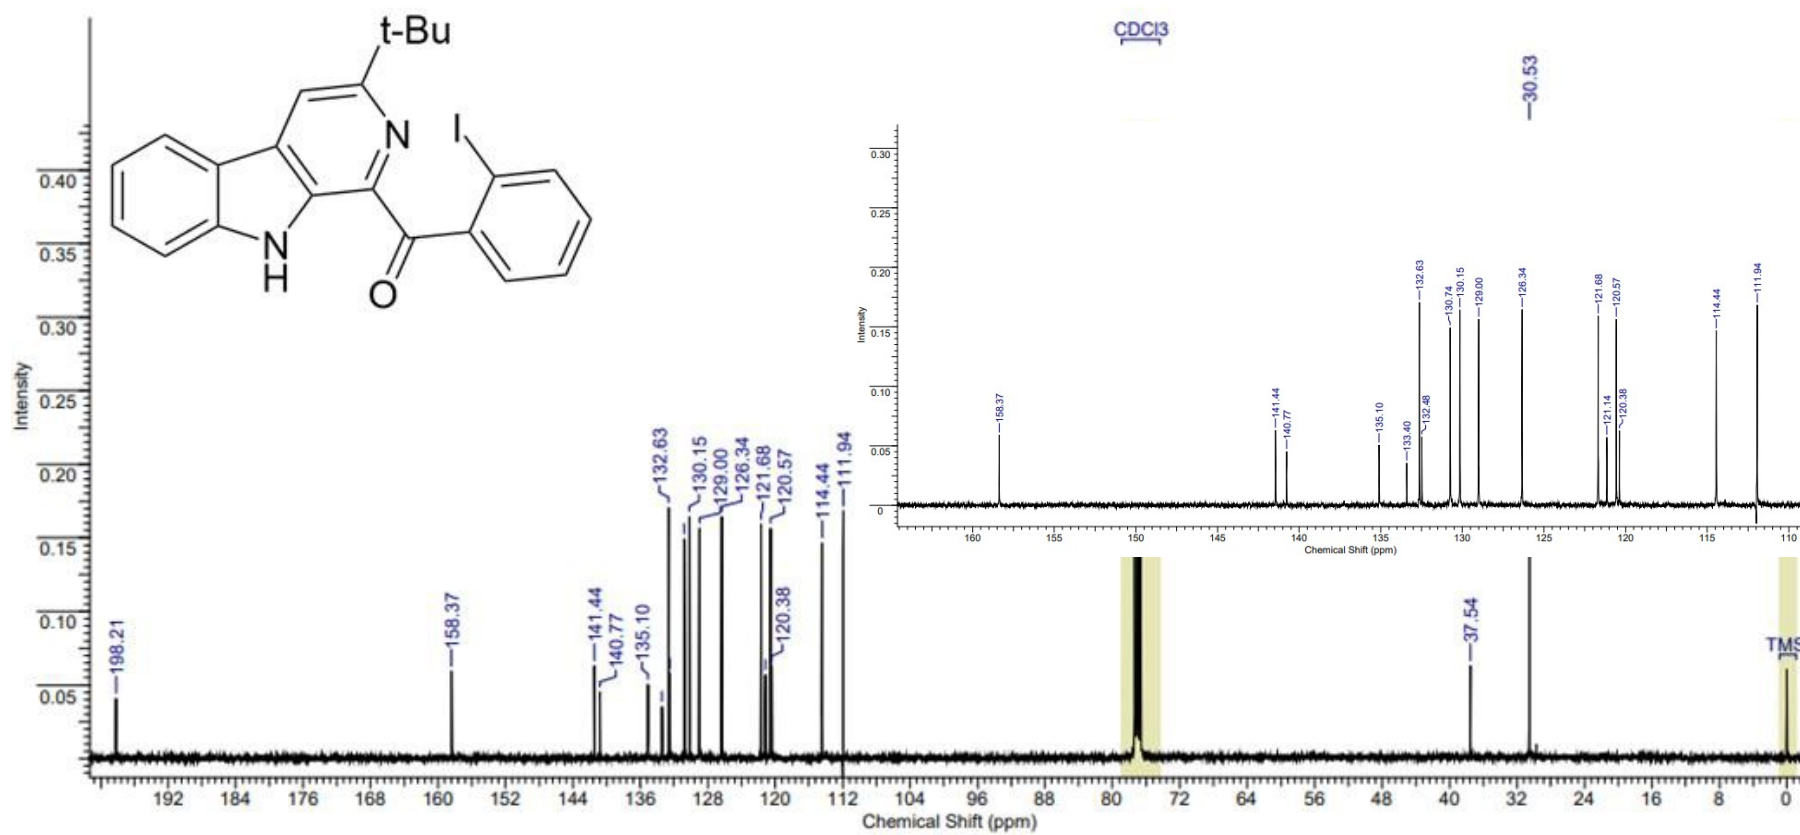

# <sup>1</sup>H NMR spectra of 12,13-dihydro-9-benzyloxy-13-oxopyrido[1,2-a:3,4-b']diindol-5-ium

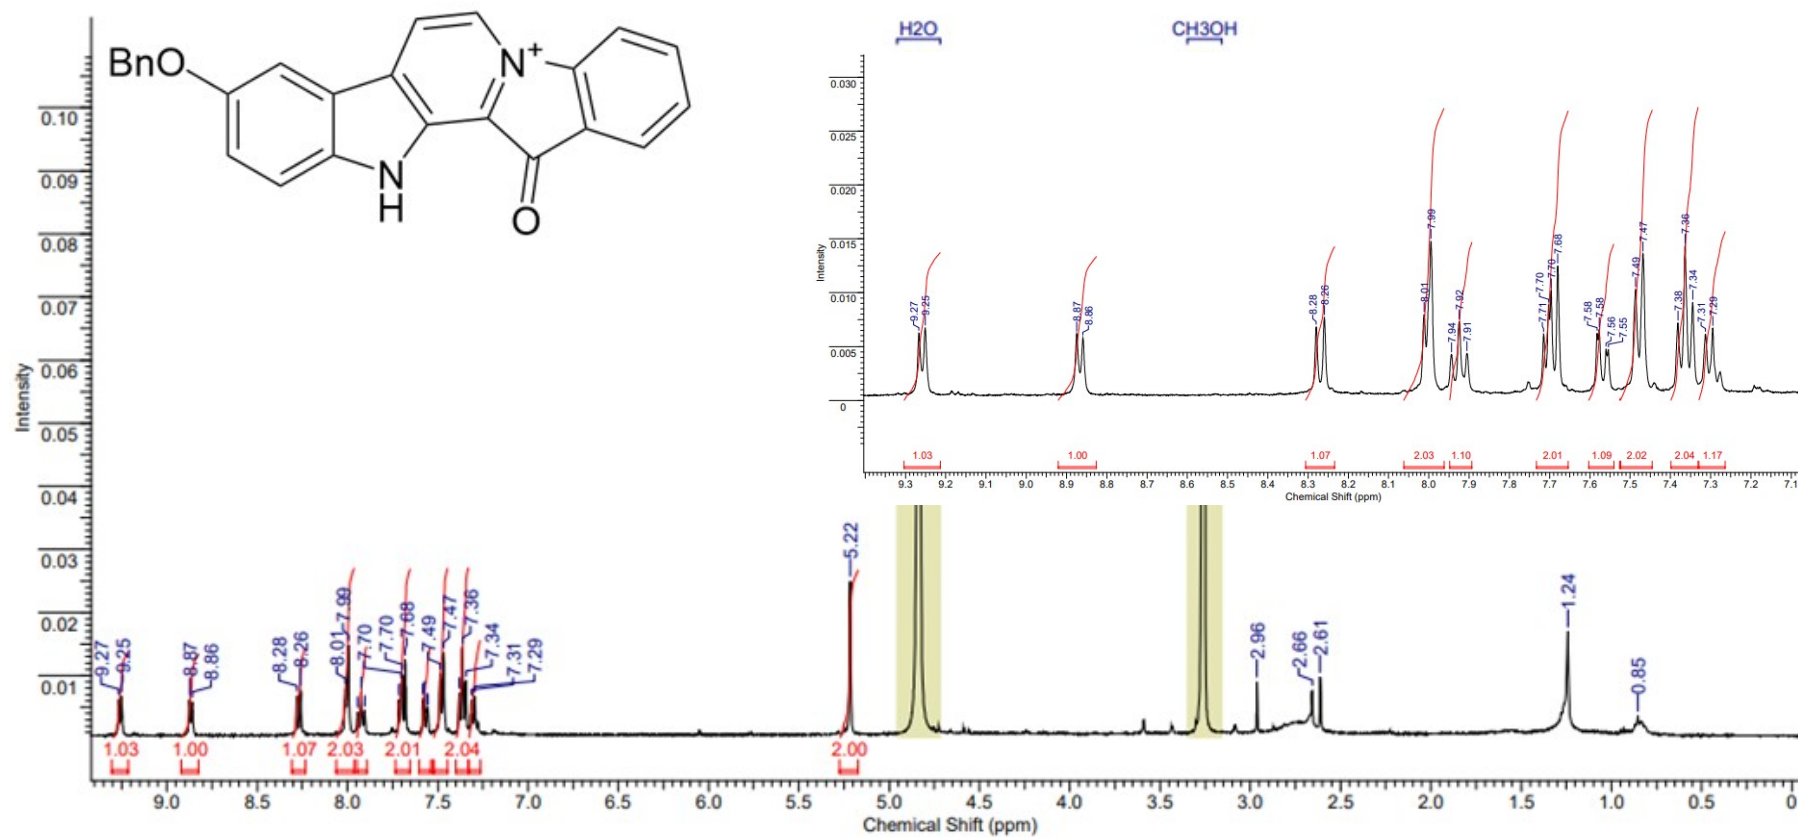

**$^{13}\text{C}$  NMR spectra of 12,13-dihydro-9-benzyloxy-13-oxopyrido[1,2-a:3,4-b']diindol-5-ium**

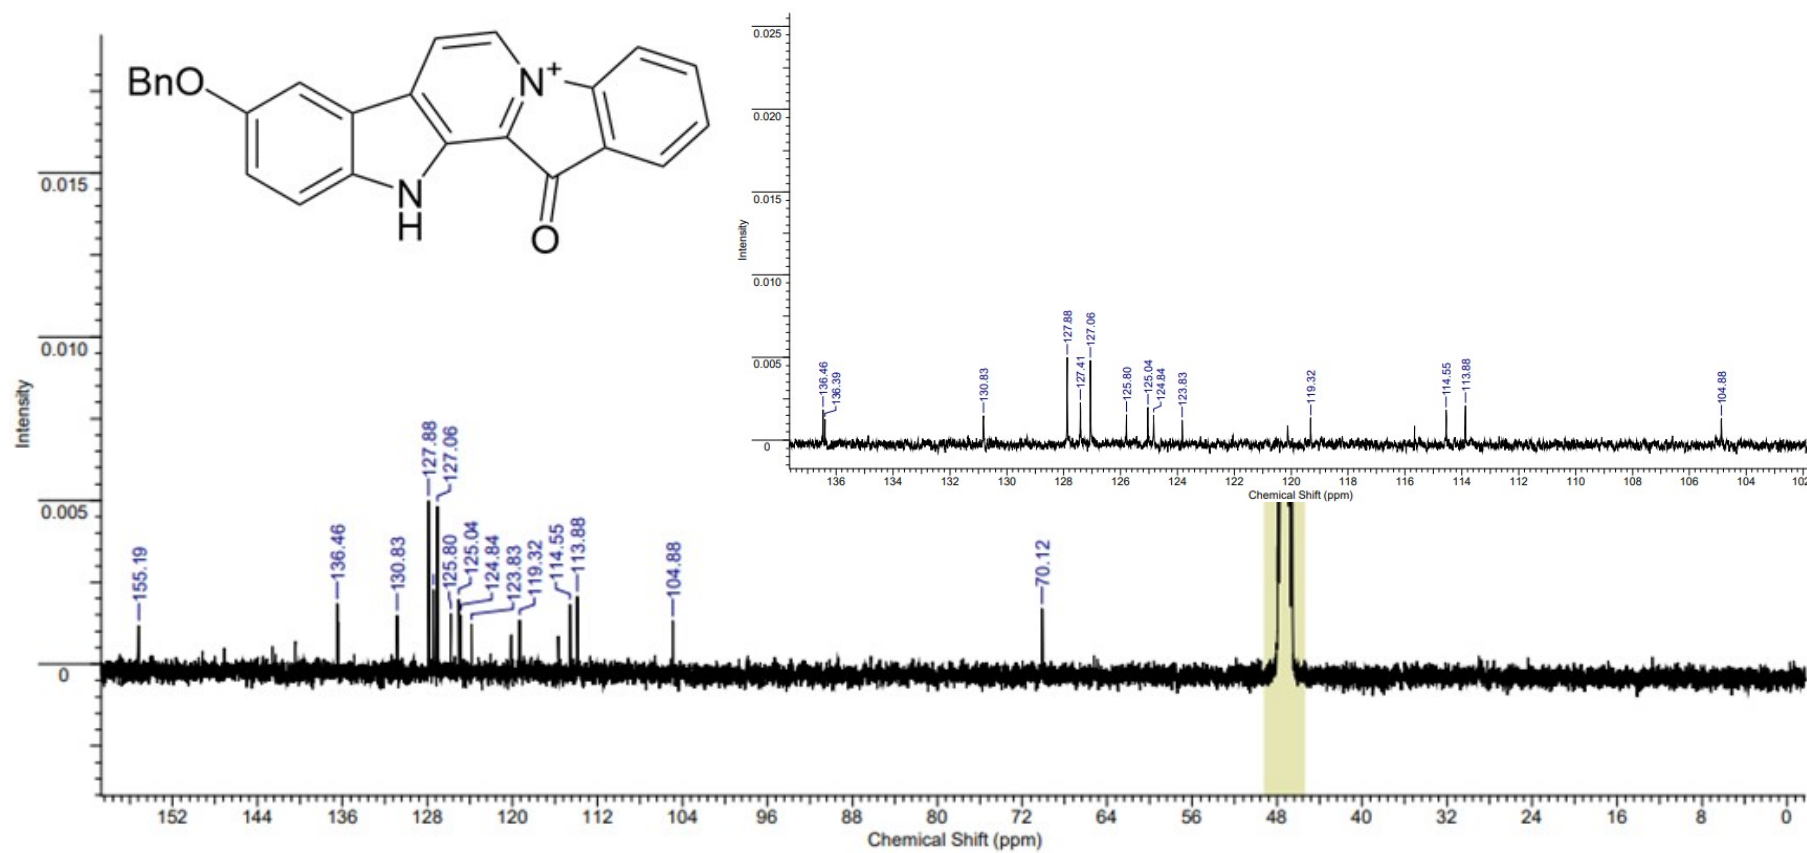

<sup>1</sup>H NMR spectra of 12,13-dihydro-6-*tert*-butyl-13-oxopyrido[1,2-a:3,4-b']diindol-5-ium

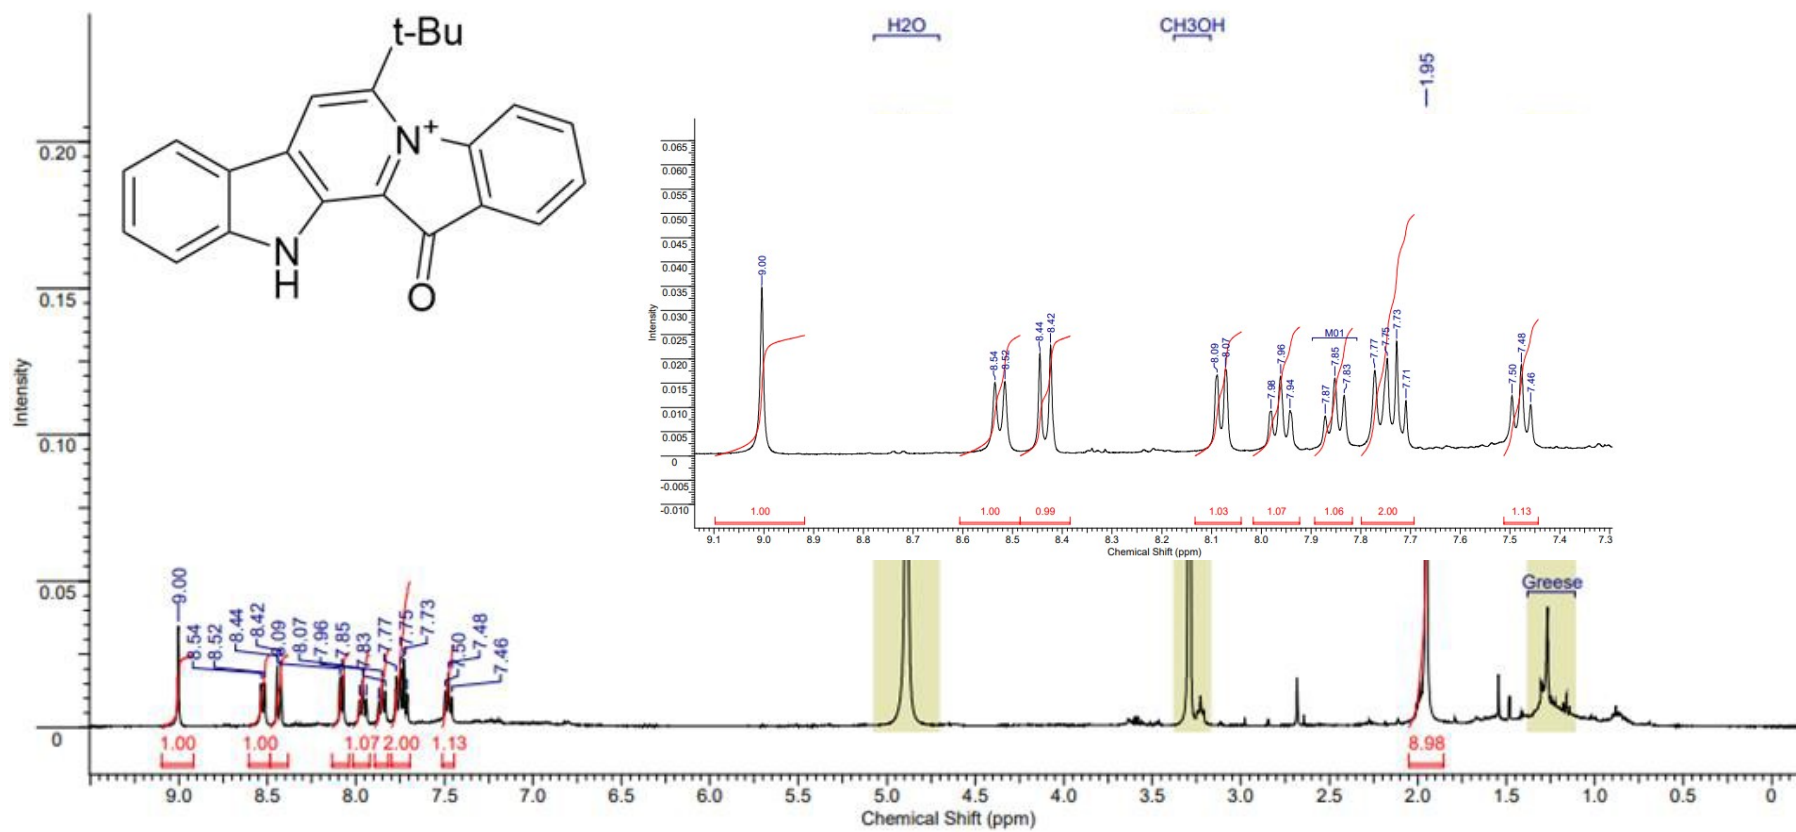

<sup>13</sup>C NMR spectra of 12,13-dihydro-6-*tert*-butyl-13-oxopyrido[1,2-a:3,4-b']diindol-5-ium

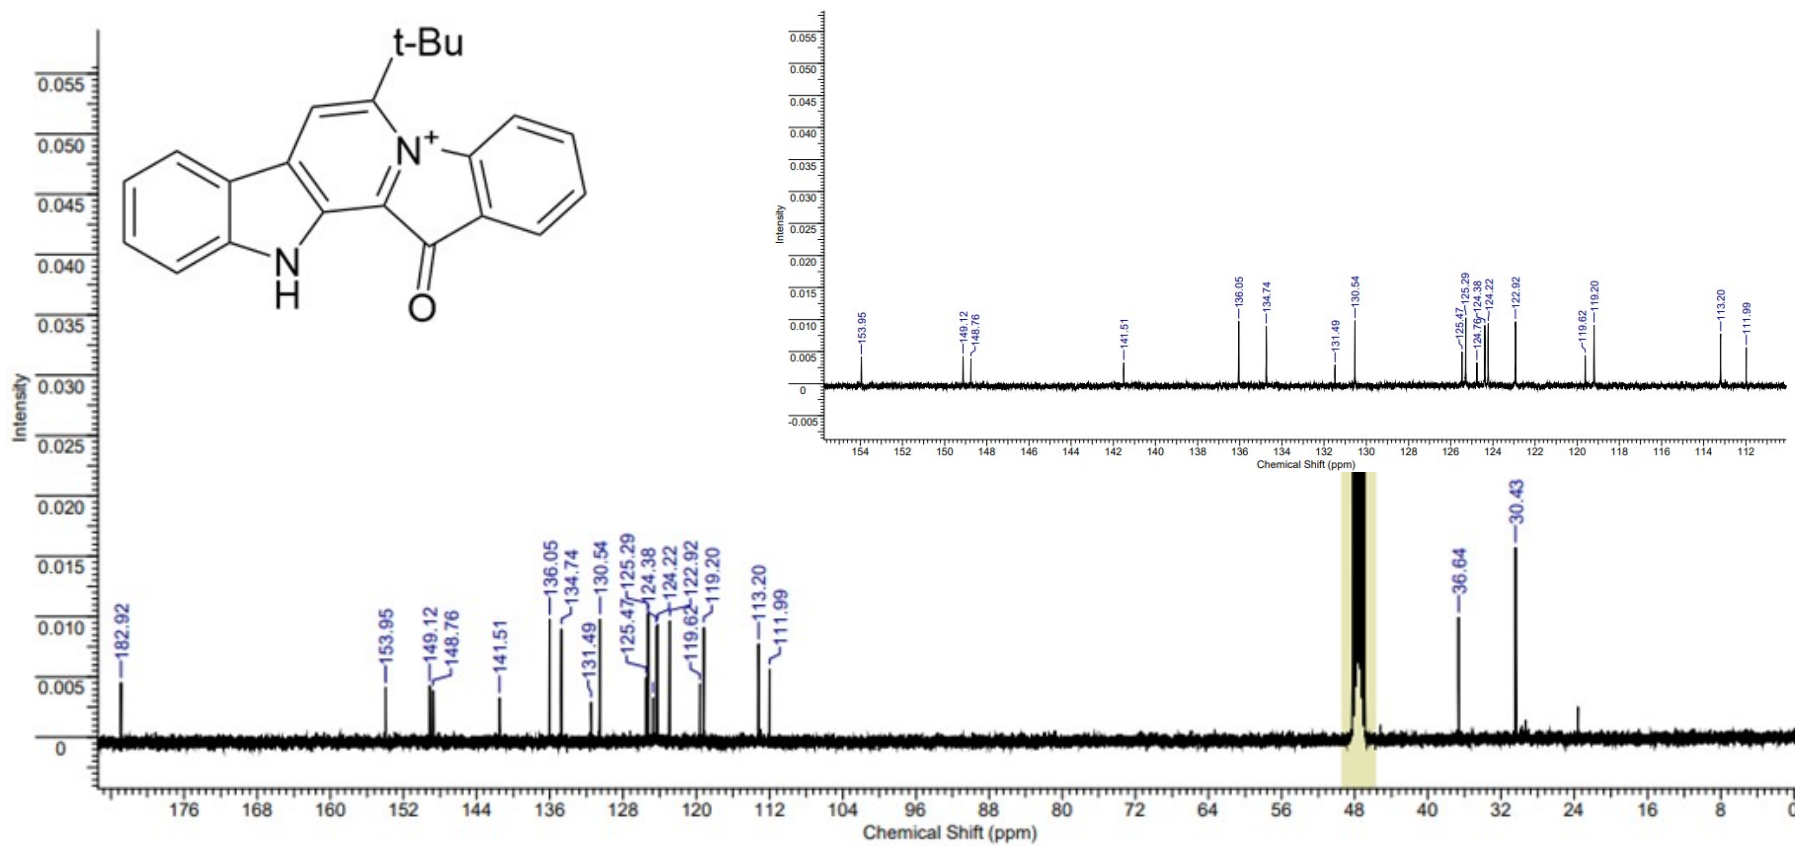

Supplement: s1 [file s1]
